# Supplementary figures and images for: Melatonin Downregulates PD-L1 Expression and Modulates Tumor Immunity in KRAS-Mutant Non-Small Cell Lung Cancer
Source: MDPI journal article supplement (doi:10.3390/ijms22115649), 2021-05-26

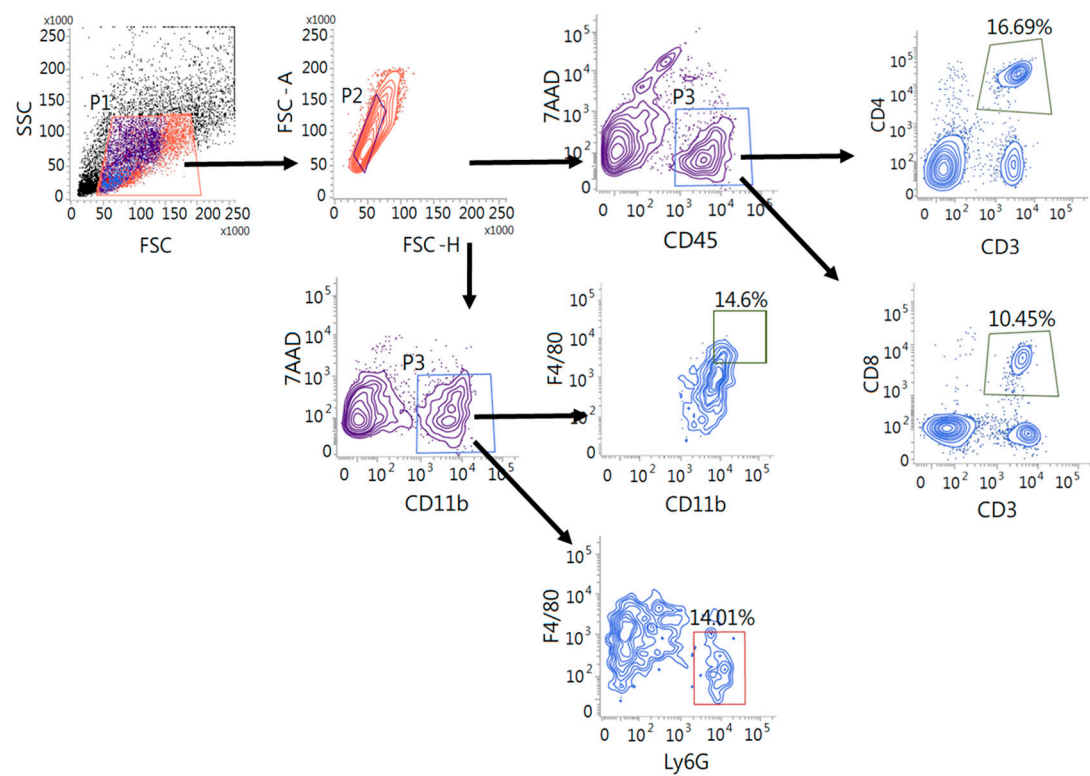

Supplemental figure 1. Gating Strategy for tumor-infiltrating lymphocytes

Supplement: s1 [file s1]
